# **A role for Fibroblast Growth Factor Receptor 1 in the pathogenesis of *Neisseria meningitidis***

Sheyda Azimi<sup>a</sup>, Lee M. Wheldon, Neil J. Oldfield, Dlawer A. A. Ala'Aldeen<sup>b</sup>,  
and Karl G. Wooldridge\*

Molecular Bacteriology and Immunology Group, School of Life Sciences, Centre for Biomolecular Science, University of Nottingham.

<sup>a</sup>Present affiliation: Georgia Institute of Technology, Atlanta, Georgia, USA

<sup>b</sup>Present affiliation: Middle East Research Institute, Dream City, Erbil, Kurdistan Region of Iraq

\*corresponding author

Mailing address:

Molecular Bacteriology and Immunology Group, Centre for Biomolecular Science, University of Nottingham, University Park, Nottingham, NG7 2RD, UK.

Email: [karl.wooldridge@nottingham.ac.uk](mailto:karl.wooldridge@nottingham.ac.uk)

Running title: FGFR1 and meningococcal pathogenesis

**Keywords:** Meningococci, *Neisseria*, meningitidis, FGFR1, epithelial, endothelial, host-pathogen

## 1 **Summary**

2 *Neisseria meningitidis* remains an important cause of human disease. It is highly  
3 adapted to the human host – its only known reservoir. Adaptations to the host  
4 environment include many specific interactions with human molecules including  
5 iron-binding proteins, components of the innate and adaptive immune systems,  
6 and cell surface receptors such as the Epidermal Growth Factor Receptor (EGFR).  
7 Interaction of the meningococcus with EGFR has been elucidated in some detail  
8 and leads to intracellular signalling and cytoskeletal changes contributing to the  
9 pathogenesis of the organism. Here, we show that the meningococcus also recruits  
10 Fibroblast Growth Factor Receptor 1 (FGFR1) onto the surface of human blood  
11 microvascular epithelial cells (HBMECs). Furthermore, meningococci internalised  
12 into these cells recruit the activated form of this receptor, and that expression and  
13 activation of FGFR1 is necessary for efficient internalisation of meningococci into  
14 HBMECs. We show that *Neisseria meningitidis* interacts specifically with the IIIc  
15 isoform of FGFR1.

## 16 **Introduction**

17 *Neisseria meningitidis*, or the meningococcus, while normally a harmless  
18 commensal of the human oropharynx, can occasionally cause devastating disease  
19 including meningitis, sepsis, disseminated intravascular coagulation (DIC) and  
20 multiple organ failure (Takada *et al.*, 2016). Penetration of meningococci through  
21 the oropharyngeal epithelial mucosa and into the blood is a crucial step in the  
22 development of sepsis and other systemic diseases, while penetration of the  
23 blood-brain barrier (BBB) is a prerequisite for the development of meningitis  
24 (Nassif, 1999, Virji, 2009). Attachment to endothelial cells induces membrane  
25 protrusions at the bacterial binding site and leads to the formation of specific  
26 protein complexes known as cortical plaques underneath the bacterial colonies  
27 (Merz *et al.*, 1999, Eugene *et al.*, 2002). The process by which these steps occur  
28 is incompletely understood (Sokolova *et al.*, 2004, Yazdankhah *et al.*, 2004, Hill  
29 *et al.*, 2010), but identified meningococcal adhesins include components of the  
30 type IV pilus (PilC1, PilC2 and PilQ), the outer membrane proteins Opa, Opc,  
31 Factor H-binding protein, PorA, PorB, HrpA, NadA, App and MspA, as well as  
32 lipooligosaccharide (LOS) (Merz *et al.*, 2000, Hadi *et al.*, 2001, Turner *et al.*, 2006,  
33 Morand *et al.*, 2009). Host cell receptors that have been identified include alpha  
34 actinin, integrins, CEACAMS, CD46, Complement receptor 3, GP96 scavenger  
35 receptor, laminin, platelet-activating factor, mannose receptor, Transferrin  
36 receptor 1, Laminin receptor and Galectin-3 (Merz *et al.*, 2000, Morand *et al.*,  
37 2009, Orihuela *et al.*, 2009, Quattroni *et al.*, 2012, Alqahtani *et al.*, 2014, Khairalla  
38 *et al.*, 2015).

39 Fibroblast Growth Factor Receptors (FGFRs) are transmembrane proteins  
40 that belong to the Receptor Tyrosine Kinase (RTK) family of signalling molecules.  
41 This family consists of four members that are responsible for recognising all 22

42 Fibroblast Growth Factor molecules (FGFs) found in humans (Ornitz *et al.*, 2001,  
43 Turner *et al.*, 2010, Guillemot *et al.*, 2011). FGFs are involved in cell  
44 differentiation, migration and proliferation during early embryogenesis and play  
45 an important role in tissue repair, wound healing (Ortega *et al.*, 1998) and tumour  
46 angiogenesis in adulthood (Gerwins *et al.*, 2000, Eswarakumar *et al.*, 2005, Presta  
47 *et al.*, 2005). Splicing of FGFR transcripts generates a variety of specific isoforms  
48 in various types of cells and tissues recognising specific types of FGF molecules  
49 (Miki *et al.*, 1992, Groth *et al.*, 2002, Eswarakumar *et al.*, 2005, Turner *et al.*,  
50 2010).

51 FGFRs are single transmembrane receptors; the extracellular N-terminal  
52 region consists of three IgG-like domains that form a ligand-binding domain with  
53 an acidic box which interacts with heparin sulphate proteoglycans (HSPGs) and  
54 Cell Adhesion Molecules (CAMs). This is followed by a transmembrane region and  
55 a C-terminal cytoplasmic region containing 7 specific tyrosine residues (Ornitz *et al.*  
56 *et al.*, 1992, Reiland *et al.*, 1993, Cavallaro *et al.*, 2004, Francavilla *et al.*, 2009).  
57 Binding of FGFs to FGFR leads to dimerisation of the receptor and activation of  
58 tyrosine autophosphorylation, which in turn activates the receptor, leading to  
59 activation of downstream signalling pathways (Mohammadi *et al.*, 1992,  
60 Mohammadi *et al.*, 1996, Lundin *et al.*, 2003, Zhang *et al.*, 2006). Previous studies  
61 confirmed the importance of FGFR1 signalling and expression in maintaining the  
62 integrity and differentiation of endothelial cells forming the microvasculature  
63 (Kanda *et al.*, 1996, Gerwins *et al.*, 2000, Murakami *et al.*, 2008).

64 The possible role of FGFRs in infectious diseases has not been excessively  
65 investigated, although FGF2 expression enhance *Chlamydia trachomatis* binding  
66 and internalisation into epithelial cells (Kim *et al.*, 2011). *C. trachomatis* facilitates  
67 entry by binding directly to FGF2, which results in binding of FGF2-bacteria-

68 heperan sulfate proteoglycan (HSPG) complexes to FGFR and internalisation of  
69 the elementary bodies of these bacteria into the epithelial cells. The study also  
70 showed higher levels of FGFR substrate 2 (FRS2) activation as a results of FGF2/*C.*  
71 *trachomatis* treatment in Hela cells, and higher level of FGF2 expression via  
72 activation of ERK1, 2. More recently, HSPG-associated FGFR1 has been implicated  
73 in internalisation of *Rickettsia rickettsii* into cultured human microvascular  
74 endothelial cells and inhibition of FGFR1 in a *R. conorii* murine model of  
75 endothelial-target spotted fever rickettsiosis reduced the rickettsial burden in  
76 infected mice (Sahni *et al.*, 2017).

77 In a study of role of RTKs, and specifically EGFRs, in meningococcal infection  
78 higher levels of FGFR1 activation were observed in endothelial cells in response to  
79 infection (Slanina *et al.*, 2014). Here we investigated the possible direct  
80 interaction of FGFRs expressed in HBMECs with meningococci and the influence of  
81 such an interaction on the ability of *N. meningitidis* to invade these cells.

82

## 83 **Results**

84 *Meningococci recruit FGFR1 on the apical surface of Human Brain Microvascular*  
85 *Endothelial Cells (HBMECs).* To study the possible interaction of FGFR1 by  
86 meningococcal colonies, HBMECs were infected with *N. meningitidis* for 4 h, fixed,  
87 and prepared for immunofluorescence microscopy. FGFR1 was recruited by  
88 meningococcal colonies on the apical surface of HBMECs. FGFR1 coincided with  
89 recruitment of both 67LR and 37LRP isoforms of laminin receptor (Figure 1). To  
90 address whether FGFR1 recruited by meningococci is activated, HBMECs were  
91 labelled with primary antibodies specific for phosphorylated tyrosine 766 (p-  
92 Y766), 67LR and 37LRP. In all cases the phosphorylated FGFR1 co-localised with  
93 meningococcal cells (Figure 1).

94 Meningococcal colonies co-localised with activated FGFR1 and 37LRP, up to 60%  
95 of which was co-localised with FGFR1. This was significantly higher than co-  
96 localisation of the microcolonies with the 67LR isoform of the receptor (Figure 1-  
97 B, C).

98 *Internalised N. meningitidis associated with activated FGFR1.* To determine  
99 whether internalised bacteria are associated with activated FGFR1, HBMECs were  
100 infected for 4 h with *N. meningitidis* and non-internalised bacterial cells were killed  
101 by gentamicin. Immunofluorescent staining for actin and activated FGFR1 (p-  
102 Y766) confirmed that meningococci recruited activated FGFR1 in the cytoplasm of  
103 HBMECs, and that the receptor was trafficked inside the cells alongside with  
104 meningococcal cells (Figure 2). To confirm that the bacterial cells in gentamicin-  
105 treated monolayers were internalised, a Z-stack image was constructed. Bacterial  
106 cells could be observed beneath the membrane of the endothelial cells (Figure 2-

107 B). Furthermore, when cells were permeabilised prior to gentamycin treatment no  
108 bacterial cells were observed (Figure 2-C).

109 *FGFR1 expression and activation is required for meningococcal invasion into*  
110 *HBMECs.* To study the role of FGFR1 in interaction of meningococci with HBMECs,  
111 FGFR1 expression was knocked down in HBMECs using siRNA treatment. Sixty  
112 hours post-siRNA treatment, cells were infected with meningococci and cell  
113 association and invasion assays were performed. The chemical inhibitor of FGFR1  
114 (SU5402) (Mohammadi *et al.*, 1997) was also used to examine the effect of  
115 inhibiting the activation of FGFR1 during meningococcal infection.

116 The numbers of meningococcal cells associated with HBMECs was significantly and  
117 dramatically reduced in response to either FGFR1 knock-down or SU5402-  
118 treatment (Figure 3-A). Treatment with scrambled siRNA under the same  
119 conditions did not result in a significant reduction in association of meningococci  
120 with HBMEC cells. There was also a significant decrease in the number of  
121 internalised meningococcal cells recovered from FGFR1 siRNA-transfected  
122 HBMECs, as well as SU5402-treated HBMECs (Figure 3-B). Again, treatment with  
123 a scrambled siRNA did not significantly affect binding of meningococci to the  
124 HBMEC cells. This demonstrates that FGFR1 expression and activation plays an  
125 important and specific role in meningococcal adhesion to and invasion into  
126 HBMECs (Supporting material, S3).

127 *There is a direct and specific interaction between FGFR1 IIIc and N. meningitidis.*  
128 To determine which isoforms of FGFR1 are expressed in HBMEC cells we performed  
129 RT-PCR using cDNA generated from total RNA extracted from HBMECs. FGFR1 IIIc  
130 and FGFR3 IIIb isoforms were both expressed in these cells (Supporting  
131 material, S1). To determine whether meningococci could interact directly with the

132 extracellular domain of FGFR1 IIIc this protein was cloned and expressed as an  
133 Fc-tagged fusion protein (Supporting material). Two other proteins: Fc-FGFR2 IIIa  
134 TM, comprising the trans-membrane region of FGFR2 IIIa fused to the  
135 immunoglobulin Fc domain, and the Fc portion of immunoglobulin alone (Fc-stop)  
136 were used as controls for possible interaction with *N. meningitidis* that was not  
137 specific to the FGFR1 IIIc (extracellular) domain. Both control proteins were  
138 derived from clones employing the same vector and purified by the same method  
139 as Fc-FGFR1 IIIc. The purified proteins were employed as an immobilised ligand  
140 in ELISA experiments.

141 ELISA plates were coated with Fc-tagged purified proteins then binding of DIG-  
142 labelled *N. meningitidis* (MC58) was assessed (Figure 4, A and B). *N. meningitidis*  
143 (MC58) bound Fc-FGFR1 to a significantly greater degree than either Fc-FGFR2  
144 IIIa TM or Fc-stop (Figure 4 A). This indicates that the observed interaction of Fc-  
145 FGFR1 was not due to meningococci binding to the Fc-tag of the expressed  
146 extracellular domain of FGFR1 and thus indicates a direct interaction between the  
147 receptor present on the apical surface of HBMECs and surface structures of *N.*  
148 *meningitidis*.

149

150 *Interaction between N. meningitidis and FGFR1 is also seen in the pathogen N.*  
151 *gonorrhoea but not commensal Neisseria species, nor other bacterial pathogens*  
152 *targeting the meninges.* Having shown that Fc-FGFR1 IIIc interacts with  
153 meningococci, we sought to establish whether other *Neisseria* species could  
154 interact with this receptor. Representative strains belonging to several *Neisseria*  
155 species including the normally commensal species *N. polysaccharea* and *N.*  
156 *lactamica*, and the pathogenic *N. gonorrhoeae* were tested for interaction with Fc-  
157 FGFR1 in ELISA assays. *N. gonorrhoeae* cells bound to wells containing Fc-FGFR1



158 at similar levels to *N. meningitidis* MC58, and in both cases to a significantly higher  
159 degree than either of the two commensal species, which did not bind to a  
160 significantly higher degree to Fc-FGFR1 than to control wells containing only Fc-  
161 FGFR2 TM (Figure 4 B). We previously showed that, like the meningococcus, the  
162 meningeal pathogens *S. pneumoniae* and *H. influenzae* each targeted the laminin  
163 receptor on HBMEC cells as a prerequisite for internalisation (Orihuela *et al.*,  
164 2009). We examined the possible interaction between these two other major  
165 causes of bacterial meningitis and the extracellular domain of FGFR1. Neither  
166 representative *S. pneumoniae* nor *H. influenzae* strains bound significantly to Fc-  
167 FGFR1 (Figure 4 C), demonstrating that the observed interaction between the  
168 pathogenic *Neisseria* species was specific.

169

## 170 **Discussion**

171 The requirement for Focal Adhesion Kinases and activation of Src in the  
172 internalization of meningococci via interaction with integrins has been reported  
173 previously (Slanina *et al.*, 2012). Considering the role of FGFR1 in maintaining the  
174 integrity of the BBB and angiogenesis (van Hinsbergh *et al.*, 2005), we examined  
175 the possible role of FGFR1 in interactions with meningococci. Confocal microscopy  
176 studies on cells infected with meningococci confirmed that these bacteria recruit  
177 FGFR1 to the apical surface of HBMECs. Recently, we showed that meningococci  
178 bind to both 37LRP and Galectin-3 on the surface of HBMECs (Alqahtani *et al.*,  
179 2014). Here, we showed that FGFR1 recruitment coincided with recruitment of  
180 both isoforms (37LRP and 67LR) of the laminin receptor; molecules already  
181 implicated in Neisserial-HBMEC interactions (Orihuela *et al.*, 2009). Ligation of the  
182 extracellular domain of FGFRs by their ligands leads to auto-phosphorylation of  
183 tyrosine residues in the cytoplasmic domain of the receptor; these phosphorylated  
184 residues subsequently serve as docking sites for a number of adaptor proteins  
185 responsible for regulation of various downstream signalling cascades (Turner *et*  
186 *al.*, 2010). The FGFR1 molecules recruited by meningococci were shown to be  
187 activated and activated receptors and meningococcal cells also co-localised with  
188  $\alpha$ -actinin. This is in agreement with previous studies on the trafficking of FGFR1  
189 into early endosomes inside the cytoplasm, and the regulation of its trafficking by  
190 Syndecan 4 in a clathrin-independent manner (Elfenbein *et al.*, 2012). We also  
191 showed that the whole receptor is internalised into the cytoplasm along with  
192 invading meningococci; this was also observed by confocal microscopy in HBMECs  
193 treated with gentamicin after 4 h of meningococcal infection. Interestingly, FGFR1  
194 engagement by basic fibroblast growth factor receptor has recently been shown  
195 to protect the integrity of HBMEC monolayers preventing the downregulation of

196 the junction proteins zO-1, occludin and VE-cadherin in response to oxygen-  
197 glucose deprivation and deoxygenation (Lin *et al.*, 2017). This might have  
198 implications for the route of entry of meningococci via a trans-cellular pathway  
199 through HBMECs rather than a para-cellular pathway in which the integrity of the  
200 monolayer would have to be compromised.

201 To determine whether FGFR1 was required for meningococcal-HBMECs  
202 interactions, FGFR1 expression was transiently inhibited by using FGFR1 siRNA  
203 transfection and in other experiments its activity was inhibited by the specific  
204 chemical inhibitor SU5402. Both FGFR1 knock-down and SU5402 treatment of  
205 HBMECs resulted in a dramatic reduction in both association and internalisation of  
206 meningococci into HBMECs. Our data confirm that direct interaction between the  
207 extracellular domain of FGFR1 and meningococci is required for consequent  
208 activation of the receptor and internalisation of bacteria into the HBMECs.

209 The mechanisms by which recruitment of FGFR1 by meningococcal colonies leads  
210 to their internalisation is unknown. Interaction of meningococci with HBMECs has  
211 previously been shown to lead to higher levels of activation of ERK 1, 2 due to  
212 activation of ErbB2 in these cells (Hoffmann *et al.*, 2001). However, levels of ERK  
213 1,2 activation in cells in which FGFR1 was knocked down by siRNA transfection  
214 were unaffected, demonstrating that FGFR1 does not regulate the levels of ERK1,  
215 2 activation (Estes *et al.*, 2006). Several studies on meningococcal infection of  
216 endothelial cells showed that invasion of bacteria requires activation of Src,  
217 phosphorylation of cortactin via the Src pathway and activation of focal adhesion  
218 kinases (FAKs) (Hoffmann *et al.*, 2001, Miller *et al.*, 2012, Slanina *et al.*, 2012).  
219 Also, it has been shown that meningococcal cells hijack the  $\beta$ -arrestin/ $\beta$  2-  
220 adrenoreceptor pathway to invade endothelial cells and cross the BBB: inhibition  
221 of  $\beta$ -arrestin mediated activation of Src, prevents the invasion of meningococcal

222 cells (Coureuil *et al.*, 2010). Src is required for cortactin phosphorylation by FGF1  
223 which can provide an alternate downstream pathway of FGFR1 from PLC $\gamma$  and can  
224 be involved in cytoskeletal rearrangement (Zhan *et al.*, 1994, Liu *et al.*, 1999).  
225 However it was reported that mutation of Y766 in FGFR1 leads to higher level  
226 activations of PLC $\gamma$  which inhibits Src activation (Landgren *et al.*, 1995). These  
227 observations suggest that FGFR1 siRNA transfection of HBMECs and chemical  
228 inhibition of FGFR1 (SU5402 treatment) may have led to the same effect on  
229 inhibition of Src activation which consequently inhibited meningococcal invasion  
230 into HBMECs. It is likely that FGFR1 plays an important role in meningococcal  
231 interaction with the BBB during infection. This effect appears to be specific to the  
232 meningococcus as the bacterial pathogens *H. influenzae* and *S. pneumoniae*,  
233 which also cross the BBB and can cause meningitis, do not interact with FGFR1  
234 IIIc on the surface of endothelial cells. On the other hand, *N. gonorrhoea*, which  
235 does not usually interact with the BBB is able to bind this receptor. The significance  
236 of this is unknown. Further investigations are required to understand the role of  
237 FGFR1 signalling in meningococcal invasion into HBMECs.

238

## 239 **Experimental Procedures**

### 240 *Bacterial growth and culture*

241 *N. meningitidis* serogroup B strain MC58 was obtained from the American Type  
242 Culture Collection (ATCC) (Tettelin *et al.*, 2000) and routinely cultured on  
243 chocolate horse blood agar (Chocolate agar; Oxoid). *H. influenzae* Rd KW20  
244 (ATCC 51097) (Fleischmann *et al.*, 1995) and *S. pneumoniae* T4R  
245 (unencapsulated) (Fernebro *et al.*, 2004) were also cultured on chocolate horse  
246 blood agar (Oxoid). All three bacteria were grown at 37°C, in an atmosphere of  
247 air plus 5% CO<sub>2</sub>.

### 248 *Cell association assay and cell invasion (Gentamicin protection) assay*

249 To quantify cell association and cell invasion of HBMECs with *N. meningitidis*  
250 HBMECs were seeded and grown overnight or for 48 h after siRNA transfection  
251 until 100% confluent in 24-well plates. Cells were infected with 1×10<sup>7</sup> CFU  
252 bacteria for 4 h in ECM-b media without any supplements. Cell association and  
253 invasion were then determined as described previously (Oldfield *et al.*, 2007).

### 254 *Confocal Immunofluorescent Microscopy*

255 HBMECs were seeded onto fibronectin-coated coverslips (1-10 × 10<sup>5</sup> cells) and  
256 grown overnight to reach a confluency of 70-80%. Cells were infected for 2-4 h  
257 (MOI 200-300). Coverslips were washed with PBS and fixed with 4%  
258 paraformaldehyde (w/v) in PBS for 5 min. Coverslips were then washed with PBS  
259 and blocked in 4% (w/v) BSA/PBS at 4°C overnight. For intracellular staining, cells  
260 were permeabilised by treatment with 0.1% Saponin, 20 mM glycine in 4%  
261 BSA/TBS at 4°C. Subsequent staining procedures were carried out in r 4%  
262 (w/v)BSA/TBS. Briefly, coverslips incubated with primary antibody for 1 h were  
263 washed with PBS followed by one wash with dH<sub>2</sub>O. Coverslips were then incubated

264 with secondary antibody for 1 h in the dark followed by washes with PBS-Tween  
265 (0.05% v/v; PBS-T), PBS and then dH<sub>2</sub>O. Coverslips were then mounted on glass  
266 slides with ProLong® Gold and SlowFade® Gold Antifade Reagents with DAPI  
267 (Invitrogen). Coverslips were analysed using a Zeiss LSM-700 confocal  
268 microscope. Images were processed with ImageJ, Adobe Photoshop and LSM  
269 Image Browser software.

#### 270 *Antibodies and reagents*

271 Antibodies detecting FGFR1 (Flg S-16 and Flg C-15), phosphorylated FGFR1  
272 (p-Y766) were purchased from Santa Cruz Biotechnology. Secondary antibodies  
273 conjugated to various fluorochromes, and Phalloidin conjugated to fluorochrome  
274 488 were obtained from Life Technologies-Invitrogen.

275 Antibody detecting 37LRP (A-7) was purchased from Santa Cruz Biotechnology  
276 and antibody against 67LR (Mluc-5) was purchased from Thermo Scientific.  
277 FGFR1-specific inhibitor SU5402 (Mohammadi *et al.*, 1997) was purchased from  
278 Calbiochem.

279 Fc-tagged FGFR1 IIIc (*ca.* 80 kDa), Fc-tagged FGFR2 IIIa TM (*ca.* 61.9 kDa) and  
280 Fc-tag (*ca.* 29.26 kDa) were expressed and purified using a protein A column (S1).

#### 281 *FGFR1 siRNA transfection in HBMECs*

282 Human FGFR1 siRNA (siGENOME SMART pool) and control scrambled siRNA were  
283 obtained from Dharmachon/Thermo Scientific and reconstituted following the  
284 manufacturer guidance. FGFR1 siRNA was resuspended in 1 ml of 1 × siRNA buffer  
285 to a final concentration of 5 μM (stock). HBMECs were seeded into 24-well plates  
286 pre-coated with fibronectin, as previously described, and grown overnight to reach  
287 a confluency of 70-80%. Transfection media was prepared by mixing serum- and  
288 antibiotic-free media with siRNA from a 50μM stock to a final concentration of

289 5 $\mu$ M; in a separate tube Transfection reagent number 1 (Thermo Scientific-  
290 Dharmacon) was added to serum and antibiotic-free media. Both tubes were  
291 incubated for 5 min at room temperature and then mixed together by pipetting  
292 and incubated at room temperature for 20-30 min. Cells were washed with serum  
293 and antibiotic-free medium and 240  $\mu$ l of complete media without antibiotics were  
294 added to each well and then the transfection mixture was added drop-wise to each  
295 well to a final concentration of 50 nM siRNA/ well. Cells were then incubated for 6  
296 h and then the media was replaced with complete media (Endothelial cell medium  
297 (ECM-b) (ScienCell) supplemented with ECGS (containing EGF, VEGF) (ScienCell)  
298 (1% v/v) and FBS (5% v/v) and penicillin/streptomycin (ScienCell; 1% v/v). The  
299 level of FGFR1 expression was examined at RNA and protein levels at 24, 48 and  
300 72 h post transfection.

### 301 *FGFR1 inhibition in HBMECs*

302 HBMECs were serum-starved and treated with SU5402 (0.5  $\mu$ M) 1 h prior to  
303 infection. Approximately  $10 \times 10^6$  / well (MOI: 10) of bacteria were added to each  
304 well and infected cells were incubated for 4 h at 37°C/5% CO<sub>2</sub> in medium  
305 containing 0.5  $\mu$ M SU5402. Cells were then washed twice with PBS and lysed in  
306 1% saponin/PBS. Cell lysates were homogenised and appropriate dilutions plated  
307 out to calculate the levels of association. For invasion assays, cells were treated  
308 with gentamicin for 1 h to kill non-internalised bacteria.

### 309 *ELISA*

310 96-well plates (NUNC Immobilizer Amino) were coated with 100  $\mu$ l of protein A  
311 (Pierce; 1  $\mu$ g ml<sup>-1</sup>) in PBS for 1 h, washed once with PBS-T and then  $86.5 \times 10^{-15}$   
312 M of Fc-tagged recombinant proteins added to each well in carbonate buffer (pH  
313 9.6). Plates were incubated for 1 h and then washed three times with PBS-T.

314 Plates were blocked with 1% BSA/PBS (w/v) for 1 h, then washed once with PBS-  
315 T. Bacterial cells harvested from overnight plates and resuspended in PBS-T,  
316 washed with the same buffer three times and finally resuspended in sodium  
317 carbonate buffer (44 mM NaHCO<sub>3</sub>, 6.0 mM Na<sub>2</sub>CO<sub>3</sub>; pH: 9.6). The OD<sub>600</sub> was  
318 measured and 20 ng (2 µl of 10 ng µl<sup>-1</sup>) of digoxigenin (DIG; Roche) was added  
319 to 1 ml of bacterial suspension with OD<sub>600</sub>:1. The bacterial suspensions were  
320 incubated for 2 h in the dark at room temperature on the shaker. Bacteria then  
321 were washed three times with PBS-T by centrifugation (13000 × *g* for 1 minute)  
322 and resuspended in 1% BSA/PBS (w/v). OD<sub>600</sub> in 1% BSA/PBS was adjusted to  
323 0.02 for ELISA. For each experiment fresh labelled bacterial strains were used.  
324 100 µl of DIG-labelled bacteria were added to each well and plates were incubated  
325 at 4°C overnight then washed five times with PBS-T. 100 µl of anti-DIG-alkaline  
326 phosphatase antibody (Roche; 0.0002 v/v) in 1% BSA/PBS was then added to  
327 each well and incubated for 1 h then washed three times with PBS-T. 200 µl of  
328 alkaline phosphatase substrate (SIGMA) was added and plates were incubated for  
329 1 h. The OD<sub>405</sub> was measured for each sample and values obtained subtracted  
330 from the binding of the same DIG-labelled strain to 1% BSA/PBS.  
331



332 **Acknowledgements**

333 We thank Dr S. Morroll for constructing the plasmid encoding Fc-Stop-LRP.

334 **Funding Statement**

335 This work was funded by the Medical Research Council, UK ([www.mrc.ac.uk](http://www.mrc.ac.uk));  
336 award number G0801173. The funders had no role in study design, data  
337 collection and analysis, decision to publish, or preparation of the manuscript.

338

## 339 References

- 340 Alqahtani, F., Mahdavi, J., Wheldon, L.M., Vassey, M., Pirinccioglu, N.,  
341 Royer, P.J., *et al.* (2014). Deciphering the complex three-way  
342 interaction between the non-integrin laminin receptor, galectin-3  
343 and *Neisseria meningitidis*. *Open biology* **4**.
- 344 Cavallaro, U. and Christofori, G. (2004). Cell adhesion and signalling by  
345 cadherins and Ig-CAMs in cancer. *Nat Rev Cancer* **4**, 118-132.
- 346 Coureuil, M., Lecuyer, H., Scott, M.G., Boularan, C., Enslin, H., Soyer,  
347 M., *et al.* (2010). Meningococcus Hijacks a beta2-  
348 adrenoceptor/beta-Arrestin pathway to cross brain microvasculature  
349 endothelium. *Cell* **143**, 1149-1160.
- 350 Elfenbein, A., Lanahan, A., Zhou, T.X., Yamasaki, A., Tkachenko, E.,  
351 Matsuda, M. and Simons, M. (2012). Syndecan 4 regulates FGFR1  
352 signaling in endothelial cells by directing macropinocytosis. *Sci*  
353 *Signal* **5**, ra36.
- 354 Estes, N.R., 2nd, Thottassery, J.V. and Kern, F.G. (2006). siRNA mediated  
355 knockdown of fibroblast growth factor receptors 1 or 3 inhibits FGF-  
356 induced anchorage-independent clonogenicity but does not affect  
357 MAPK activation. *Oncology reports* **15**, 1407-1416.
- 358 Eswarakumar, V.P., Lax, I. and Schlessinger, J. (2005). Cellular signaling  
359 by fibroblast growth factor receptors. *Cytokine Growth Factor Rev*  
360 **16**, 139-149.
- 361 Eugene, E., Hoffmann, I., Pujol, C., Couraud, P.O., Bourdoulous, S. and  
362 Nassif, X. (2002). Microvilli-like structures are associated with the  
363 internalization of virulent capsulated *Neisseria meningitidis* into  
364 vascular endothelial cells. *J Cell Sci* **115**, 1231-1241.
- 365 Fernebro, J., Andersson, I., Sublett, J., Morfeldt, E., Novak, R.,  
366 Tuomanen, E., *et al.* (2004). Capsular expression in *Streptococcus*  
367 *pneumoniae* negatively affects spontaneous and antibiotic-induced  
368 lysis and contributes to antibiotic tolerance. *The Journal of*  
369 *infectious diseases* **189**, 328-338.
- 370 Fleischmann, R.D., Adams, M.D., White, O., Clayton, R.A., Kirkness, E.F.,  
371 Kerlavage, A.R., *et al.* (1995). Whole-genome random sequencing  
372 and assembly of *Haemophilus influenzae* Rd. *Science* **269**, 496-512.
- 373 Francavilla, C., Cattaneo, P., Berezin, V., Bock, E., Ami, D., de Marco, A.,  
374 *et al.* (2009). The binding of NCAM to FGFR1 induces a specific  
375 cellular response mediated by receptor trafficking. *The Journal of*  
376 *cell biology* **187**, 1101-1116.
- 377 Gerwins, P., Skoldenberg, E. and Claesson-Welsh, L. (2000). Function of  
378 fibroblast growth factors and vascular endothelial growth factors  
379 and their receptors in angiogenesis. *Crit Rev Oncol Hematol* **34**,  
380 185-194.
- 381 Groth, C. and Lardelli, M. (2002). The structure and function of vertebrate  
382 fibroblast growth factor receptor 1. *Int J Dev Biol* **46**, 393-400.

- 383 Guillemot, F. and Zimmer, C. (2011). From cradle to grave: the multiple  
384 roles of fibroblast growth factors in neural development. *Neuron* **71**,  
385 574-588.
- 386 Hadi, H.A., Wooldridge, K.G., Robinson, K. and Ala'Aldeen, D.A. (2001).  
387 Identification and characterization of App: an immunogenic  
388 autotransporter protein of *Neisseria meningitidis*. *Molecular*  
389 *microbiology* **41**, 611-623.
- 390 Hill, D.J., Griffiths, N.J., Borodina, E. and Virji, M. (2010). Cellular and  
391 molecular biology of *Neisseria meningitidis* colonization and invasive  
392 disease. *Clin Sci (Lond)* **118**, 547-564.
- 393 Hoffmann, I., Eugene, E., Nassif, X., Couraud, P.O. and Bourdoulous, S.  
394 (2001). Activation of ErbB2 receptor tyrosine kinase supports  
395 invasion of endothelial cells by *Neisseria meningitidis*. *The Journal*  
396 *of cell biology* **155**, 133-143.
- 397 Kanda, S., Landgren, E., Ljungstrom, M. and Claesson-Welsh, L. (1996).  
398 Fibroblast growth factor receptor 1-induced differentiation of  
399 endothelial cell line established from tsA58 large T transgenic mice.  
400 *Cell growth & differentiation : the molecular biology journal of the*  
401 *American Association for Cancer Research* **7**, 383-395.
- 402 Khairalla, A.S., Omer, S.A., Mahdavi, J., Aslam, A., Dufailu, O.A., Self, T.,  
403 *et al.* (2015). Nuclear trafficking, histone cleavage and induction of  
404 apoptosis by the meningococcal App and MspA autotransporters.  
405 *Cellular microbiology* **17**, 1008-1020.
- 406 Kim, J.H., Jiang, S., Elwell, C.A. and Engel, J.N. (2011). Chlamydia  
407 trachomatis co-opts the FGF2 signaling pathway to enhance  
408 infection. *PLoS Pathog* **7**, e1002285.
- 409 Landgren, E., Blume-Jensen, P., Courtneidge, S.A. and Claesson-Welsh,  
410 L. (1995). Fibroblast growth factor receptor-1 regulation of Src  
411 family kinases. *Oncogene* **10**, 2027-2035.
- 412 Lin, L., Wang, Q., Qian, K., Cao, Z., Xiao, J., Wang, X., *et al.* (2017).  
413 bFGF Protects Against Oxygen Glucose Deprivation/Reoxygenation-  
414 Induced Endothelial Monolayer Permeability via S1PR1-Dependent  
415 Mechanisms. *Mol Neurobiol*.
- 416 Liu, J., Huang, C. and Zhan, X. (1999). Src is required for cell migration  
417 and shape changes induced by fibroblast growth factor 1. *Oncogene*  
418 **18**, 6700-6706.
- 419 Lundin, L., Ronnstrand, L., Cross, M., Hellberg, C., Lindahl, U. and  
420 Claesson-Welsh, L. (2003). Differential tyrosine phosphorylation of  
421 fibroblast growth factor (FGF) receptor-1 and receptor proximal  
422 signal transduction in response to FGF-2 and heparin. *Exp Cell Res*  
423 **287**, 190-198.
- 424 Merz, A.J., Enns, C.A. and So, M. (1999). Type IV pili of pathogenic  
425 *Neisseriae* elicit cortical plaque formation in epithelial cells. *Mol*  
426 *Microbiol* **32**, 1316-1332.
- 427 Merz, A.J. and So, M. (2000). Interactions of pathogenic *neisseriae* with  
428 epithelial cell membranes. *Annual review of cell and developmental*  
429 *biology* **16**, 423-457.

- 430 Miki, T., Bottaro, D.P., Fleming, T.P., Smith, C.L., Burgess, W.H., Chan,  
431 A.M. and Aaronson, S.A. (1992). Determination of ligand-binding  
432 specificity by alternative splicing: two distinct growth factor  
433 receptors encoded by a single gene. *Proceedings of the National  
434 Academy of Sciences of the United States of America* **89**, 246-250.
- 435 Miller, F., Lecuyer, H., Join-Lambert, O., Bourdoulous, S., Marullo, S.,  
436 Nassif, X. and Coureuil, M. (2012). *Neisseria meningitidis*  
437 colonization of the brain endothelium and cerebrospinal fluid  
438 invasion. *Cell Microbiol.*
- 439 Mohammadi, M., Dikic, I., Sorokin, A., Burgess, W.H., Jaye, M. and  
440 Schlessinger, J. (1996). Identification of six novel  
441 autophosphorylation sites on fibroblast growth factor receptor 1 and  
442 elucidation of their importance in receptor activation and signal  
443 transduction. *Molecular and cellular biology* **16**, 977-989.
- 444 Mohammadi, M., Dionne, C.A., Li, W., Li, N., Spivak, T., Honegger, A.M.,  
445 *et al.* (1992). Point mutation in FGF receptor eliminates  
446 phosphatidylinositol hydrolysis without affecting mitogenesis.  
447 *Nature* **358**, 681-684.
- 448 Mohammadi, M., McMahon, G., Sun, L., Tang, C., Hirth, P., Yeh, B.K., *et*  
449 *al.* (1997). Structures of the tyrosine kinase domain of fibroblast  
450 growth factor receptor in complex with inhibitors. *Science* **276**,  
451 955-960.
- 452 Morand, P.C., Drab, M., Rajalingam, K., Nassif, X. and Meyer, T.F. (2009).  
453 *Neisseria meningitidis* differentially controls host cell motility  
454 through PilC1 and PilC2 components of type IV Pili. *PloS one* **4**,  
455 e6834.
- 456 Murakami, M., Nguyen, L.T., Zhuang, Z.W., Moodie, K.L., Carmeliet, P.,  
457 Stan, R.V. and Simons, M. (2008). The FGF system has a key role  
458 in regulating vascular integrity. *J Clin Invest* **118**, 3355-3366.
- 459 Nassif, X. (1999). Interaction mechanisms of encapsulated meningococci  
460 with eucaryotic cells: what does this tell us about the crossing of  
461 the blood-brain barrier by *Neisseria meningitidis*? *Current opinion in  
462 microbiology* **2**, 71-77.
- 463 Oldfield, N.J., Bland, S.J., Taraktsoglou, M., Dos Ramos, F.J., Robinson,  
464 K., Wooldridge, K.G. and Ala'Aldeen, D.A. (2007). T-cell stimulating  
465 protein A (TspA) of *Neisseria meningitidis* is required for optimal  
466 adhesion to human cells. *Cell Microbiol* **9**, 463-478.
- 467 Orihuela, C.J., Mahdavi, J., Thornton, J., Mann, B., Wooldridge, K.G.,  
468 Abouseada, N., *et al.* (2009). Laminin receptor initiates bacterial  
469 contact with the blood brain barrier in experimental meningitis  
470 models. *J Clin Invest* **119**, 1638-1646.
- 471 Ornitz, D.M. and Itoh, N. (2001). Fibroblast growth factors. *Genome Biol*  
472 **2**, REVIEWS3005.
- 473 Ornitz, D.M., Yayon, A., Flanagan, J.G., Svahn, C.M., Levi, E. and Leder,  
474 P. (1992). Heparin is required for cell-free binding of basic fibroblast  
475 growth factor to a soluble receptor and for mitogenesis in whole  
476 cells. *Molecular and cellular biology* **12**, 240-247.

- 477 Ortega, S., Ittmann, M., Tsang, S.H., Ehrlich, M. and Basilico, C. (1998).  
478 Neuronal defects and delayed wound healing in mice lacking  
479 fibroblast growth factor 2. *Proceedings of the National Academy of*  
480 *Sciences of the United States of America* **95**, 5672-5677.
- 481 Presta, M., Dell'Era, P., Mitola, S., Moroni, E., Ronca, R. and Rusnati, M.  
482 (2005). Fibroblast growth factor/fibroblast growth factor receptor  
483 system in angiogenesis. *Cytokine Growth Factor Rev* **16**, 159-178.
- 484 Quattroni, P., Li, Y., Lucchesi, D., Lucas, S., Hood, D.W., Herrmann, M.,  
485 *et al.* (2012). Galectin-3 binds *Neisseria meningitidis* and increases  
486 interaction with phagocytic cells. *Cellular microbiology* **14**, 1657-  
487 1675.
- 488 Reiland, J. and Rapraeger, A.C. (1993). Heparan sulfate proteoglycan and  
489 FGF receptor target basic FGF to different intracellular destinations.  
490 *J Cell Sci* **105 ( Pt 4)**, 1085-1093.
- 491 Sahni, A., Patel, J., Narra, H.P., Schroeder, C.L.C., Walker, D.H. and  
492 Sahni, S.K. (2017). Fibroblast growth factor receptor-1 mediates  
493 internalization of pathogenic spotted fever *rickettsiae* into host  
494 endothelium. *PLoS one* **12**, e0183181.
- 495 Slanina, H., Hebling, S., Hauck, C.R. and Schubert-Unkmeir, A. (2012).  
496 Cell invasion by *Neisseria meningitidis* requires a functional  
497 interplay between the focal adhesion kinase, Src and cortactin. *PLoS*  
498 *one* **7**, e39613.
- 499 Slanina, H., Mundlein, S., Hebling, S. and Schubert-Unkmeir, A. (2014).  
500 Role of epidermal growth factor receptor signaling in the interaction  
501 of *Neisseria meningitidis* with endothelial cells. *Infection and*  
502 *immunity* **82**, 1243-1255.
- 503 Sokolova, O., Heppel, N., Jagerhuber, R., Kim, K.S., Frosch, M.,  
504 Eigenthaler, M. and Schubert-Unkmeir, A. (2004). Interaction of  
505 *Neisseria meningitidis* with human brain microvascular endothelial  
506 cells: role of MAP- and tyrosine kinases in invasion and  
507 inflammatory cytokine release. *Cell Microbiol* **6**, 1153-1166.
- 508 Takada, S., Fujiwara, S., Inoue, T., Kataoka, Y., Hadano, Y., Matsumoto,  
509 K., *et al.* (2016). Meningococemia in Adults: A Review of the  
510 Literature. *Intern Med* **55**, 567-572.
- 511 Tettelin, H., Saunders, N.J., Heidelberg, J., Jeffries, A.C., Nelson, K.E.,  
512 Eisen, J.A., *et al.* (2000). Complete genome sequence of *Neisseria*  
513 *meningitidis* serogroup B strain MC58. *Science* **287**, 1809-1815.
- 514 Turner, D.P., Marietou, A.G., Johnston, L., Ho, K.K., Rogers, A.J.,  
515 Wooldridge, K.G. and Ala'Aldeen, D.A. (2006). Characterization of  
516 MspA, an immunogenic autotransporter protein that mediates  
517 adhesion to epithelial and endothelial cells in *Neisseria meningitidis*.  
518 *Infection and immunity* **74**, 2957-2964.
- 519 Turner, N. and Grose, R. (2010). Fibroblast growth factor signalling: from  
520 development to cancer. *Nat Rev Cancer* **10**, 116-129.
- 521 van Hinsbergh, V.W. and Rabelink, T.J. (2005). FGFR1 and the bloodline  
522 of the vasculature. *Arteriosclerosis, thrombosis, and vascular*  
523 *biology* **25**, 883-886.

- 524 Virji, M. (2009). Pathogenic *neisseriae*: surface modulation, pathogenesis  
525 and infection control. *Nature reviews. Microbiology* **7**, 274-286.
- 526 Yazdankhah, S.P. and Caugant, D.A. (2004). *Neisseria meningitidis*: an  
527 overview of the carriage state. *J Med Microbiol* **53**, 821-832.
- 528 Zhan, X., Plourde, C., Hu, X., Friesel, R. and Maciag, T. (1994).  
529 Association of fibroblast growth factor receptor-1 with c-Src  
530 correlates with association between c-Src and cortactin. *J Biol Chem*  
531 **269**, 20221-20224.
- 532 Zhang, X., Ibrahim, O.A., Olsen, S.K., Umemori, H., Mohammadi, M. and  
533 Ornitz, D.M. (2006). Receptor specificity of the fibroblast growth  
534 factor family. The complete mammalian FGF family. *J Biol Chem*  
535 **281**, 15694-15700.
- 536
- 537

## 538 **Figure Legends**

### 539 **Figure 1. Activated FGFR1 is recruited by *N. meningitidis* colonies.** (A)

540 HBMECs were infected with meningococcal cells (MOI: 200) for 2-4 h. *N.*  
541 *meningitidis* colonies were visualized with DAPI (blue), FGFR1 was probed with  
542 anti-FGFR1 primary antibody and detected with anti-goat Alexa Fluor 680 antibody  
543 (red). 37LRP and 67LR were probed with primary antibodies and detected with  
544 anti-mouse Alexa Fluor 488 antibodies (green). FGFR1 was recruited by  
545 meningococcal colonies, which coincides with recruitment of 37LRP and, to a less  
546 extent, 67LR. Co-localisation area is shown by arrows (images are representative  
547 of 10 infected cells). (B) FGFR1 phosphorylated at Tyrosine 766 (p-Y766) was  
548 labelled with Alexa Fluor 680 (red) and both isoforms of Laminin receptor (67LR  
549 and 37LRP) with Alexa Fluor 488 (green). Recruitment of activated FGFR1 (p-  
550 Y766) coincided with recruitment of 37LRP and, to a less extent, 67LR. Levels of  
551 co-localization of MC58 with 37LRP, 67LR and p-Y766 (activated FGFR1) were  
552 quantified by measuring the percentage of co-localisation of each receptor with  
553 MC58 in 30 fields. There was a significant difference between recruitment of  
554 activated FGFR1 and 37LRP with recruitment of 67LR ( $p= 0.0009$  and  $p= 0.0028$   
555 respectively; two tailed unpaired t-test).

556 **Figure 2. Activated FGFR1 is recruited by internalised meningococci**  
557 **within HBMECs.** (A) In infected HBMECs  $\alpha$ -actinin and actin were labelled with  
558 Alexa Fluor 680 (Red) and the activated form of FGFR1 (p-Y766) labelled with  
559 Alexa Fluor 488 (Green). MC58 was labelled with DAPI (Blue). Internalised  
560 bacteria co-localised with both  $\alpha$ -actinin and activated FGFR1 (p-Y766) (arrow  
561 heads). (B and C) Z-stack image of meningococcal colonies shows that  
562 internalised bacteria (co-localising with  $\alpha$ -actinin) recruit activated FGFR1 (p-  
563 Y766) inside the cells.  
564  
565



566 **Figure 3. Expression and activation of FGFR1 plays an important role in**  
567 **the invasion of meningococci into HBMECs.** (A) HBMECs were infected with  
568 *N. meningitidis* MC58 for 4 h (MOI: 10). Cells were washed and lysed in 500 µl of  
569 1% saponin in PBS and 100 µl of homogenized lysates used for serial dilution  
570 preparation (up to 10 fold). 10 µl of each dilution was plated onto chocolate agar  
571 and CFUs were calculated for each sample. There was a significant reduction in  
572 the number of meningococci associated with HBMECs after FGFR1 knockdown  
573 (FGFR1 siRNA;  $p=0.0031$ , two tailed unpaired t-test,  $n=8$ ) or in SU5402-treated  
574 cells in which activation of FGFR1 is chemically inhibited ( $p=0.0054$ , two tailed  
575 unpaired t-test,  $n=8$ ; experiments were performed in triplicate wells and means  
576 shown represent 8 independent experiments). (B) For invasion assays, gentamicin  
577 was added after 4 h of infection and plates were incubated for a further 1 h. Cells  
578 were then washed, lysed, homogenised and dilutions plated onto chocolate blood  
579 agar plates. There was a significant difference between the number of internalised  
580 meningococci in FGFR1 siRNA-transfected cells compared to untreated cells, or  
581 cells treated with scrambled siRNA ( $p=0.0003$  two tailed unpaired t-test,  $n=7$ ).  
582 Chemical inhibition of FGFR1 activation also inhibited internalization of  
583 meningococcal cells into HBMECs ( $p=0.0005$  two-tailed unpaired t-test,  $n=7$ , the  
584 error bars represent standard deviation of mean).

585

586 **Figure 4. *N. meningitidis* and *N. gonorrhoeae* interact directly with the**  
587 **extracellular domain of FGFR1.** Fc-tagged purified proteins were used as the  
588 immobilised ligand in ELISA experiments. Levels of interaction with DIG-labelled  
589 MC58 were measured; the values shown are those following subtraction of binding  
590 to 1% BSA/PBS. (A) *N. meningitidis* MC58 interacts directly with the extracellular  
591 domain of Fc-FGFR1 (two tailed t-test; each experiment was performed in 6  
592 technical replicates and the data shown is derived from 6 independent  
593 experiments). (B) Binding of commensal *Neisseria*, but not *N. gonorrhoeae*, to  
594 FGFR1 IIIc was significantly lower than that shown by *N. meningitidis* MC58. (C)  
595 The meningeal pathogens *H. influenzae* and *S. pneumoniae* bound FGFR1 IIIc to  
596 a negligible degree that was significantly lower than cells of *N. meningitidis* MC58  
597 ( $p < 0.002$ ).

598

599

600

601

602

603

604

605

606

607

608

609

610

611

612

## 613 Figures

A

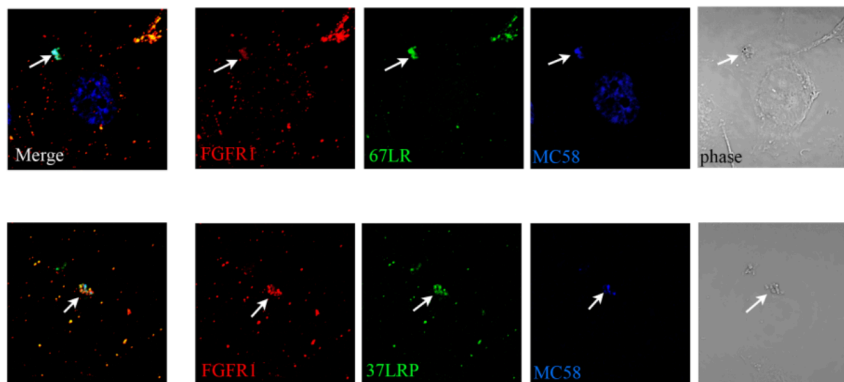

B

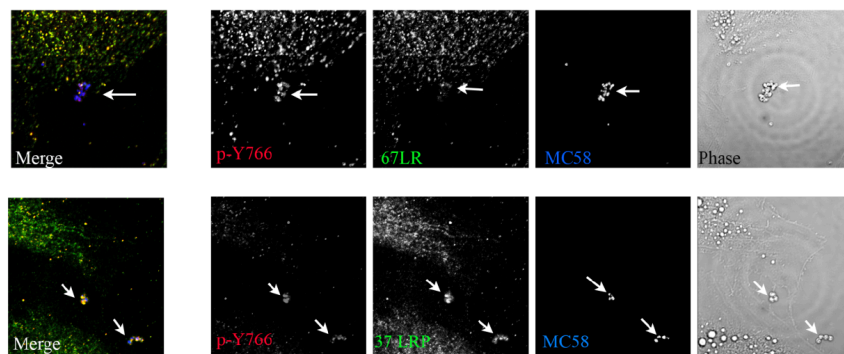

C

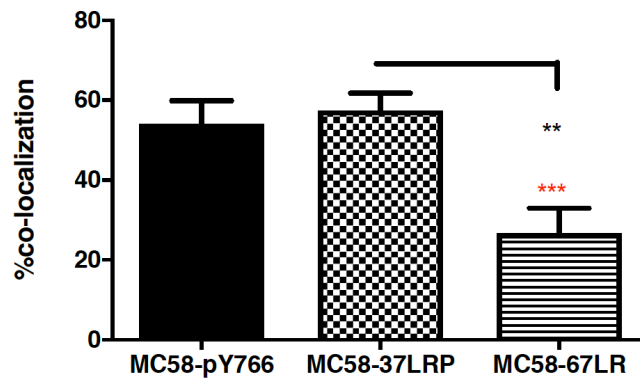

$p=0.0028$

$p=0.0009$

614

615 Figure 1.

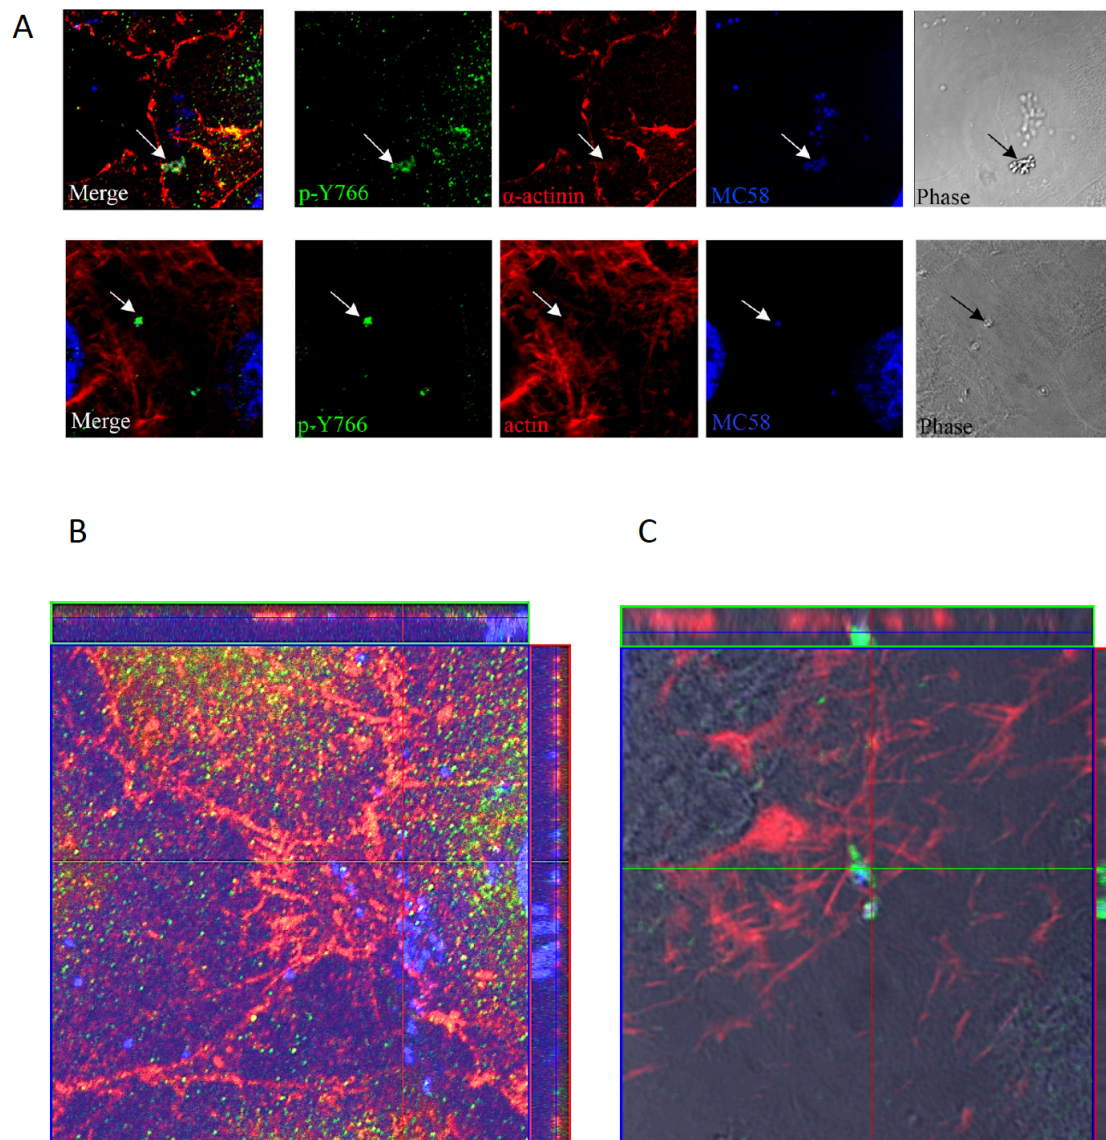

616

617 Figure 2.

A

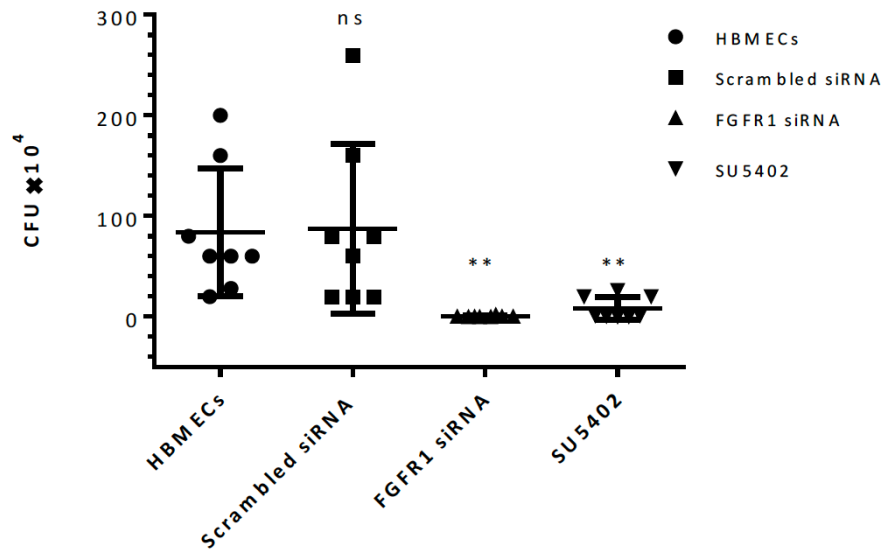

B

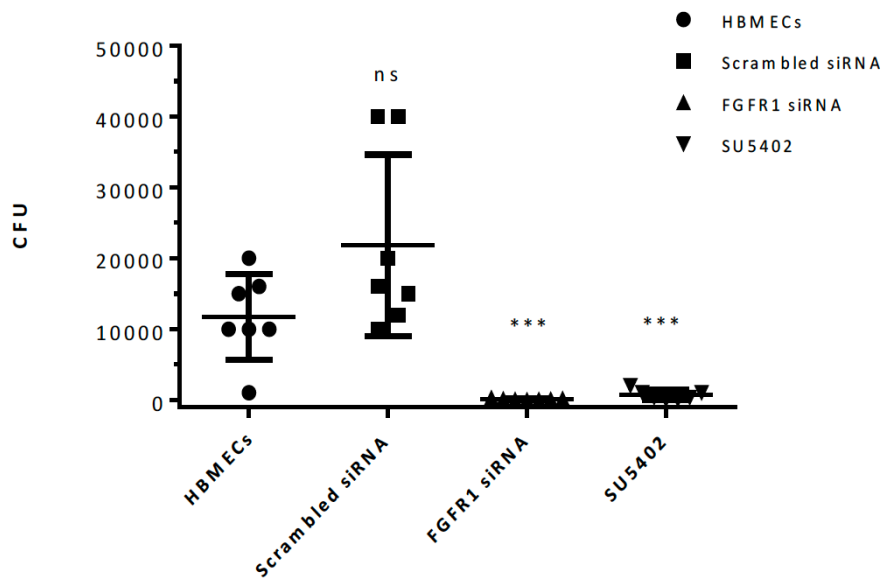

618

619 Figure 3.

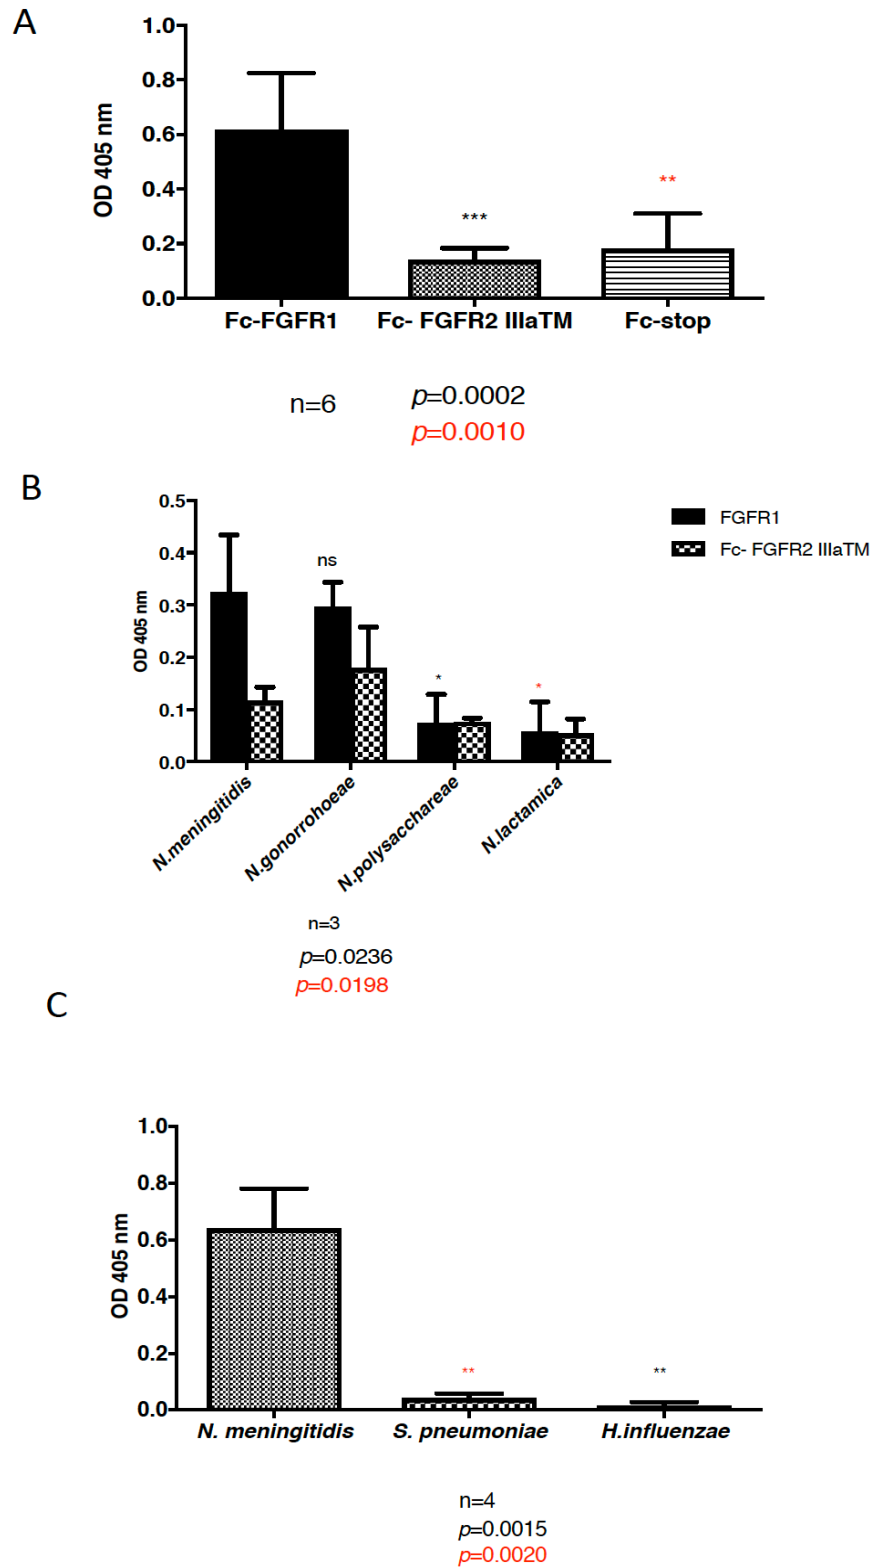

620

621 Figure 4.

622

623

# Supporting material

624

625

626 **A role for Fibroblast Growth Factor Receptor 1 in the**

627 **pathogenesis of *Neisseria meningitidis***

628

629

630

631 Sheyda Azimi<sup>a</sup>, Lee M. Wheldon, Neil J. Oldfield, Dlawer A. A. Ala'Aldeen<sup>b</sup>,  
632 and Karl G. Wooldridge\*

633

634

635

636

637 Molecular Bacteriology and Immunology Group, School of Life Sciences, Centre  
638 for Biomolecular Science, University of Nottingham.

639

640 <sup>a</sup>Present affiliation: Georgia Institute of Technology, Atlanta, Georgia, USA

641

642 <sup>b</sup>Present affiliation:

643 Middle East Research Institute, Dream City, Erbil, Kurdistan Region of Iraq

644

645 \*corresponding author

646

647 Mailing address:

648 Molecular Bacteriology and Immunology Group, Centre for Biomolecular Science,  
649 University of Nottingham, University Park, Nottingham, NG7 2RD, UK.

650

651 Email: [karl.wooldridge@nottingham.ac.uk](mailto:karl.wooldridge@nottingham.ac.uk)

652

653

654

655

656

657

658

659

660 Running title: FGFR1 and meningococcal pathogenesis

661

662 **Keywords:** Meningococci, *Neisseria*, meningitidis, FGFR1, epithelial, endothelial,  
663 host-pathogen

664

665 *HBMECs express FGFR1 IIIc and FGFR3 IIIb isoforms*

666 HBMECs were grown overnight, RNA extracted and cDNA prepared. This was then  
667 used as template to amplify the third IgG-like domain of FGFRs (exon 7, 8 IIIb)  
668 and (exon 7, 9 IIIc) isoforms (Hajihosseini *et al.*, 1999). RT-PCR showed that  
669 HBMECs express FGFR1 IIIc and FGFR3 IIIb isoforms.

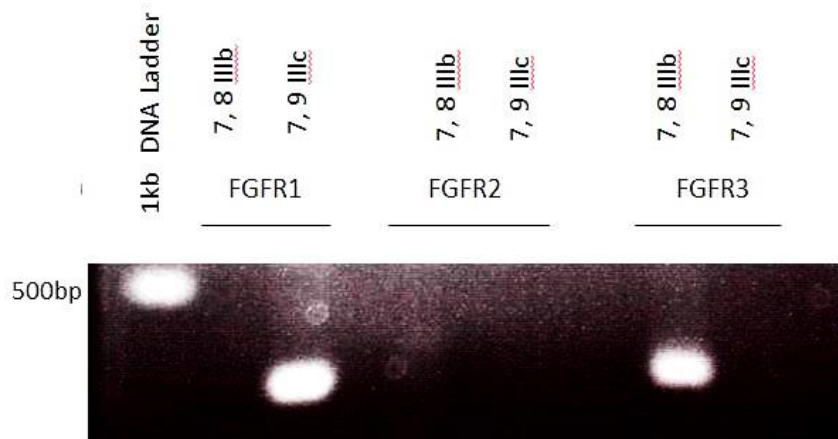

670

671 **S1. HBMECs express FGFR1 IIIc and FGFR3 IIIb isoforms.** RT-PCR  
672 performed using cDNA generated from total RNA extracted from HBMECs. 100ng  
673 of cDNA was used in as template in each PCR reaction. Various combinations of  
674 primers specific for exon 7, 8 and 9 were used to determine the type of FGFR  
675 expressed by HBMECs.

676

677 *Construction of FGFR1 IIIc into pEF-Bos-ss-Fc-ires-TPZ mammalian vector*

678 HBMECs were routinely grown in fibronectin-coated T75 flasks (BD Bioscience).  
679 For RNA extraction, cells were harvested by trypsin treatment. Cell suspensions  
680 were then centrifuged for 5 min at  $300 \times g$ , the supernatant was discarded and  
681 cells were lysed in lysis buffer (SIGMA GenElute™ Mammalian Total RNA Miniprep  
682 Kits) supplemented with 1% (v/v) 2-β-Mercaptoethanol and RNA extracted  
683 according to the manufacturer's protocol (Sigma GenElute™ Mammalian Total RNA  
684 Miniprep Kit). The concentration of extracted RNA was measured using a Nanodrop  
685 spectrophotometer and adjusted to  $200 \text{ ng } \mu\text{l}^{-1}$ . To remove traces of genomic DNA



686 from RNA samples, DNase treatment was performed following the manufacturers  
687 protocol (Turbo DNase, Life Technologies). 10 µl of RNA was then used for cDNA  
688 preparation using the High Capacity cDNA Reverse Transcription kit (Applied  
689 Biosystem). HBMEC cDNA was then used as template to amplify the extracellular  
690 domain of FGFR1 IIIc isoform. Primers were designed to amplify the extracellular  
691 domain of FGFR1 containing restriction sites for NdeI and NotI enzymes. The  
692 amplified PCR product was gel purified, digested and then ligated into NotI and  
693 NdeI-digested pEF-Bos-ss-Fc-FGFR2IIIaTM-ires-TPZ (Mizushima et al., 1990,  
694 Burgar et al., 2002, Wheldon et al., 2011) using the LigaFast TMRapid DNA  
695 Ligation System (Promega). The ligated plasmid was used for transformation of  
696 competent *E. coli* JM109 cells (Promega). Plasmids extracted from ampicillin-  
697 resistant transformants were screened by restriction digestion and DNA  
698 sequencing. The plasmid from one correct clone was named pEF-Bos-ss-Fc-  
699 extFGFR1IIIc-ires-TPZ.

700

|                                                 |                                                   |
|-------------------------------------------------|---------------------------------------------------|
| <b>Forward</b>                                  | gcgGCTTAATCATATGcagggaccggatccATGTGGAGCTGGAAGTGCC |
| <b>Reverse</b><br><b>(extracellular domain)</b> | gcgcgATTAA <del>GCGGCCG</del> cttaCAGGGGCGAGGTCA  |

701

702

703

704

A

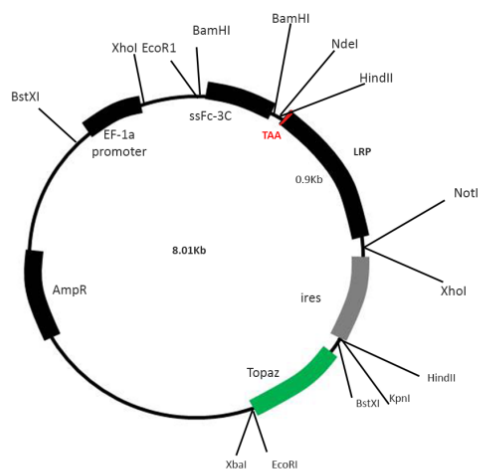

705

B

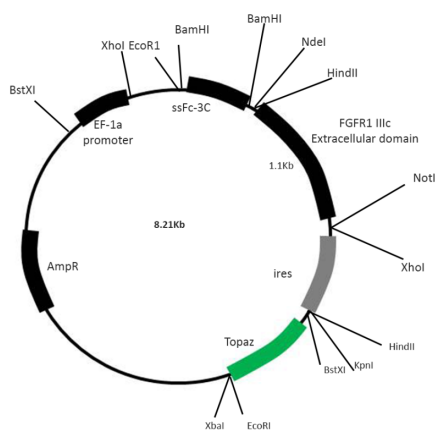

C

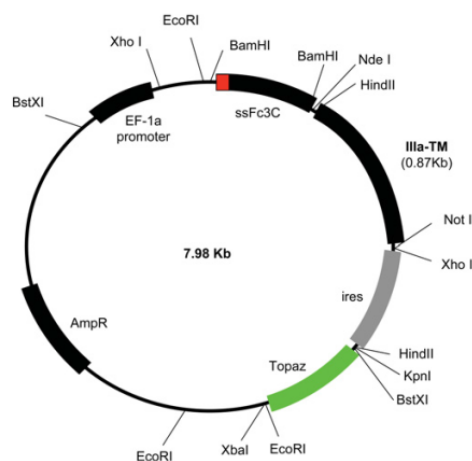

706

707

708

709 **S2. Schematic view of the plasmid pEF-Bos-ss-Fc-extFGFR1IIIc-ires-TPZ. The**  
710 **extracellular domain of FGFR1 IIIc (A) and LRP were replaced with FGFR2 IIIaTM**  
711 **insert of the plasmid pEF-Bos-ss-Fc-FGFR2 IIIa TM-ires-TPZ (C) (Wheldon *et al.*,**  
712 **2011). Stop codon (TAA in Red-B) was introduced in start of the LRP coding gene**  
713 **to be able express the Fc-tag and not the LRP protein (B). The plasmid encoding Fc-**  
714 **Stop-LRP was constructed in house by Dr. S. Morroll.**

715 *Purification of Fc-tagged recombinant proteins*

716 Media was collected 72 h post-transfection of 293T cells and Fc-tagged  
717 recombinant proteins purified on a Protein AIG-Sepharose (Source BioScience  
718 LifeSciences) column. Briefly, the media was diluted 1:1 (v/v) with binding buffer  
719 (0.05 M sodium borate, 0.15 M sodium chloride; pH: 8). 100 µl of beads were  
720 added to 30ml of diluted media and incubated with shaking at 4°C overnight. The  
721 column was prepared and washed 4-5 × with binding buffer. The column was then  
722 washed with binding buffer containing 0.5 M sodium chloride. Proteins were eluted  
723 in 1 ml of 0.1 M glycine (pH: 2.5) and neutralised with 100 µl of 1 M Tris-HCl (pH:  
724 9) per 1 ml of eluted samples. A total number of 9-10 protein fractions were eluted  
725 and stored at -80°C. Protein concentration in each fraction was quantified using  
726 the BCA kit following manufacturer's protocol (Thermo Scientific).

727

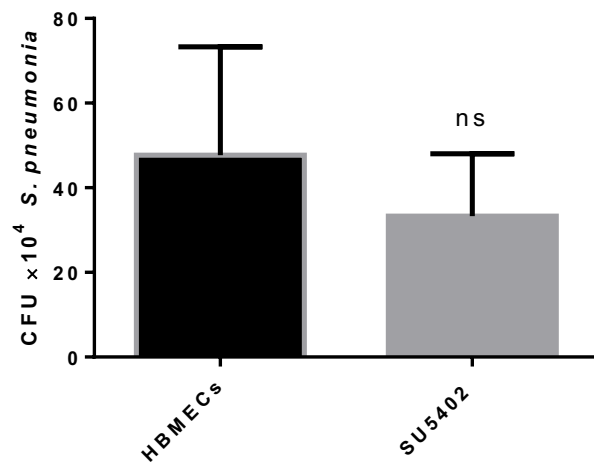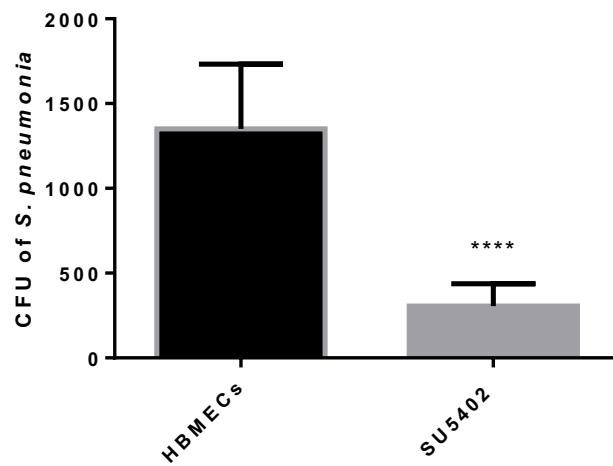

728

729 **S 3. Chemical inhibition of FGFR1 does not affect the number of *S.***  
730 ***pneumoniae* associated with HBMECs but reduced the number of invaded**  
731 **bacteria into HBMECs.** HBMECs were infected with *S. pneumoniae* at MOI: 10.  
732 Cell association and invasion assays were performed and the CFUs were  
733 calculated.

734

735

## 736 **References**

- 737 Burgar, H.R., Burns, H.D., Elsdon, J.L., Lalioti, M.D. and Heath, J.K. (2002).  
738 Association of the signaling adaptor FRS2 with fibroblast growth factor  
739 receptor 1 (Fgfr1) is mediated by alternative splicing of the  
740 juxtamembrane domain. *J Biol Chem* **277**, 4018-4023.
- 741 Hajihosseini, M.K. and Dickson, C. (1999). A subset of fibroblast growth factors  
742 (Fgfs) promote survival, but Fgf-8b specifically promotes astroglial  
743 differentiation of rat cortical precursor cells. *Mol Cell Neurosci* **14**, 468-  
744 485.
- 745 Mizushima, S. and Nagata, S. (1990). pEF-BOS, a powerful mammalian  
746 expression vector. *Nucleic Acids Res* **18**, 5322.
- 747 Wheldon, L.M., Khodabukus, N., Patey, S.J., Smith, T.G., Heath, J.K. and  
748 Hajihosseini, M.K. (2011). Identification and characterization of an  
749 inhibitory fibroblast growth factor receptor 2 (FGFR2) molecule, up-  
750 regulated in an Apert Syndrome mouse model. *Biochem J* **436**, 71-81.  
751

752

753
